# Supplementary material
Source: HighWire-hosted journal article supplement (http://dmd.aspetjournals.org/highwire/filestream/66220/field_highwire_adjunct_files/0/Supplemental_Lindgren50351_resub.pdf)
Supplement: Supplemental_Lindgren50351_resub.pdf [file Supplemental_Lindgren50351_resub.pdf]

**Supplemental material to:**

**Biotransformation of two  $\beta$ -secretase Inhibitors Including Ring Opening and contraction of a Pyrimidine Ring**

Anders Lindgren, Göran Eklund, Dominika Turek, Jonas Malmquist, Britt-Marie Swahn, Jörg Holenz, Stefan von Berg, Sofia Karlström and Tjerk Bueters

Drug metabolism and Disposition

**Abbreviations**

DEA, diethylamine; DME, dimethoxyethane; DMF, N,N-dimethylformamide; DMSO, dimethyl sulfoxide; OAc, acetate; rt, room temperature; sat., saturated; SFC, supercritical fluid chromatography

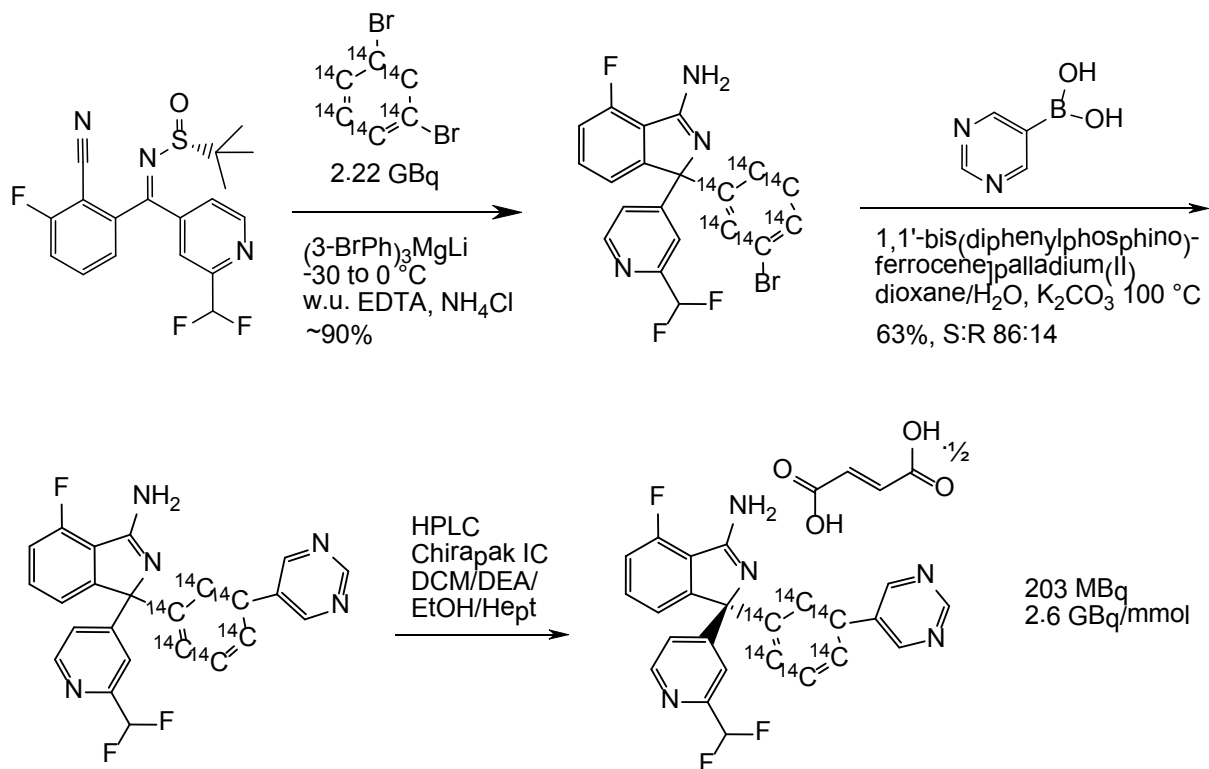

**Scheme 1.** Synthesis of [ $^{14}\text{C}$ ]AZD3839 hemifumarate from [ $\text{U-}^{14}\text{C}$ ]-1,3-dibromobenzene [Malmquist J (2011) [ $\text{U-}^{14}\text{C}$ ]- and [ $^{13}\text{C}_6$ ]-1,3-dibromobenzene; useful precursors with a rare substitution pattern in the synthesis of isotopologs. *J Label Compd Radiopharm* **54**:408–410].

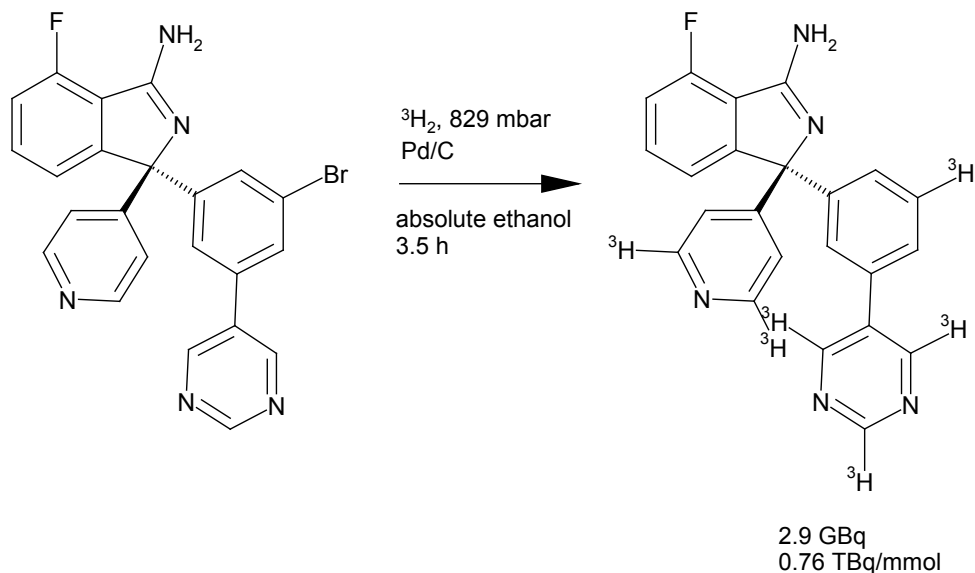

**Scheme 2.** Synthesis of [ $^3\text{H}$ ]-(*1S*)-4-fluoro-1-(pyridin-4-yl)-1-(3-(pyrimidin-5-yl)phenyl)-1*H*-isoindol-3-amine prepared from a brominated compound synthesized in a similar way as for the unlabeled material [Swahn BM, Kolmodin K, Karlström S, et al., (2012b) Design and Synthesis of  $\beta$ -Site Amyloid Precursor Protein Cleaving Enzyme (BACE1) Inhibitors with in vivo brain reduction of  $\beta$ -amyloid peptides. *J Med Chem* **55**:9346-9361.] The labeled positions were identified by running  $^1\text{H}$  and  $^3\text{H}$  NMR experiments (Figure S1).

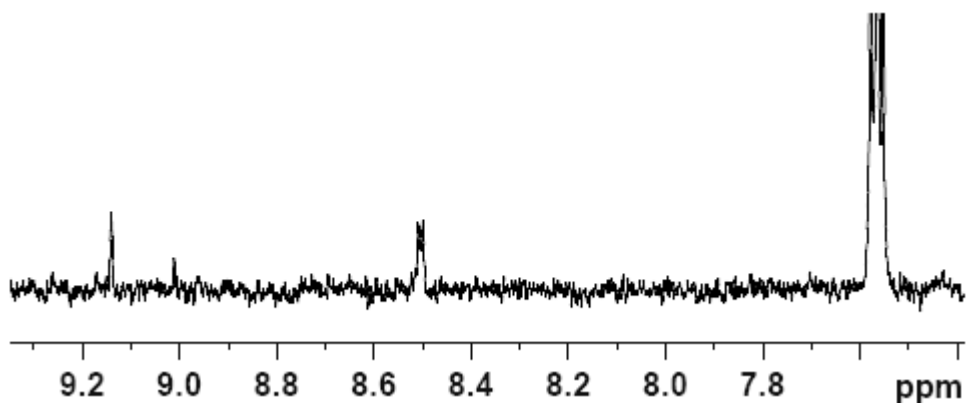

**Figure 1.**  $^3\text{H}$ -NMR of 75 MBq [ $^3\text{H}$ ]-(*S*)-1-pyridin-4-yl-4-fluoro-1-(3-(pyrimidin-5-yl)phenyl)-1*H*-isoindol-3-amine at 140  $\mu\text{M}$  in  $\text{CD}_3\text{OD}$ .

## Synthesis of metabolite M1 and M2

### 4-(3-amino-1-(3-bromophenyl)-4-fluoro-1H-isoindol-1-yl)-2-(difluoromethyl)pyridine 1-oxide

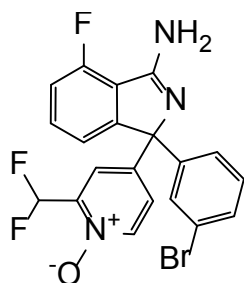

Hydrogen peroxide (0.598 mL, 5.86 mmol) was added to 1-(3-bromophenyl)-1-(2-(difluoromethyl)pyridin-4-yl)-4-fluoro-1H-isoindol-3-amine (a 84:16 ratio of the S and R- isomers) (422 mg, 0.98 mmol) in acetic acid (10 mL). The reaction mixture was stirred at 60 °C for three days after three days at rt the mixture was diluted with K<sub>2</sub>CO<sub>3</sub> (aq sat) and ethyl acetate, the phases were separated. NaCl (s) was added and the aqueous phase was extracted twice with ethyl acetate. The combined organics were dried (Na<sub>2</sub>SO<sub>4</sub>), filtered and concentrated. Purification by flash silica gel chromatography using a gradient of chloroform/ methanol 40:1-30:1-20:1 gave the title compound (125 mg) in 29 % yield. <sup>1</sup>H NMR (500 MHz, DMSO-*d*<sub>6</sub>) δ ppm 6.81 (br. s., 2 H), 7.16 (t, *J*=53.28 Hz, 1 H), 7.25 - 7.38 (m, 3 H), 7.42 - 7.53 (m, 4 H), 7.58 (td, *J*=7.88, 4.73 Hz, 1 H), 7.69 (d, *J*=7.57 Hz, 1 H), 8.29 (d, *J*=6.94 Hz, 1 H); MS (ES+) *m/z* 448 [M+1]<sup>+</sup>.

### B(M2), (S)-4-(3-amino-4-fluoro-1-(3-(pyrimidin-5-yl)phenyl)-1H-isoindol-1-yl)-2-(difluoromethyl)pyridine 1-oxide

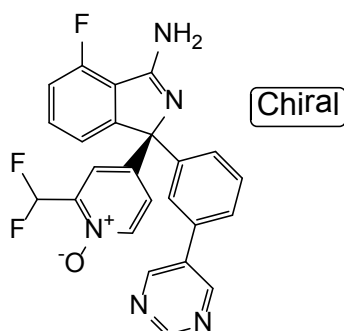

4-(3-Amino-1-(3-bromophenyl)-4-fluoro-1H-isoindol-1-yl)-2-(difluoromethyl)pyridine 1-oxide (60 mg, 0.13 mmol), pyrimidin-5-ylboronic acid (21.56 mg, 0.17 mmol), [1,1-bis(diphenylphosphino)ferrocene]dichloropalladium(II) (9.79 mg, 0.01 mmol), potassium carbonate (2 M, aq.) (0.201 mL, 0.40 mmol) and DMF (2.1 mL) were added to a vial and microwaved for 20 min at

150 °C. The mixture was diluted with brine, NaHCO<sub>3</sub> (aq. sat.) and ethyl acetate and the phases were separated. The aqueous phase was extracted twice with ethyl acetate, the combined organics were dried (Na<sub>2</sub>SO<sub>4</sub>), filtered through diatomaceous earth and concentrated. Purification by flash silica gel chromatography using a gradient of chloroform/ methanol 15:1-10:1-8:1 gave 4-(3-amino-4-fluoro-1-(3-(pyrimidin-5-yl)phenyl)-1H-isoindol-1-yl)-2-(difluoromethyl)pyridine 1-oxide (32.0 mg, 52.5 %). The material was, combined with 25 mg from a similar reaction, based on 4-(3-amino-1-(3-bromophenyl)-4-fluoro-1H-isoindol-1-yl)-2-(difluoromethyl)pyridine 1-oxide (50 mg, 0.11 mmol).

The enantiomers were separated by a SFC Berger Multigram II on a Chiralpak AD-H column (4.6\*250 mm; 5 µm) using 20 % methanol + 0.1 % diethyl amine/ 80 % CO<sub>2</sub> as a mobile phase with a flow of 50 ml/min. The second eluting isomer was collected to give the title compound (27 mg) in 49 % yield, >99 % pure by UV and >99 % enantiomeric purity.

<sup>1</sup>H NMR (500 MHz, DMSO-*d*<sub>6</sub>) δ ppm 6.78 (br. s., 2 H), 7.16 (t, *J*=53.28 Hz, 1 H), 7.25 - 7.34 (m, 1 H), 7.43 - 7.55 (m, 4 H), 7.58 (td, *J*=7.88, 4.73 Hz, 1 H), 7.66 - 7.73 (m, 2 H), 7.81 (d, *J*=7.57 Hz, 1 H), 8.29 (d, *J*=6.94 Hz, 1 H), 9.05 (s, 2 H), 9.18 (s, 1 H); MS (ES+) *m/z* 448 [M+1]<sup>+</sup>

**B(M1), (S)-5-(3-(3-amino-1-(2-(difluoromethyl)pyridin-4-yl)-4-fluoro-1H-isoindol-1-yl)phenyl)pyrimidine 1-oxide**

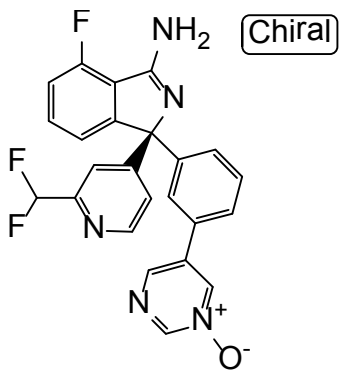

1-(3-Bromophenyl)-1-(2-(difluoromethyl)pyridin-4-yl)-4-fluoro-1H-isoindol-3-amine (a 85:15 ratio of the S and R- isomers) (300 mg, 0.69 mmol), potassium acetate (136 mg, 1.39 mmol), 1,1'-bis(diphenylphosphino)ferrocenedichloro palladium(II) dichloromethane complex (56.7 mg, 0.07 mmol) and bis(pinacolato)diboron (194 mg, 0.76 mmol) in DME (10 mL) were microwaved for 30 min at 130 °C. 5-Bromopyrimidine 1-oxide (145 mg, 0.76 mmol) and water (3 mL) were added. The resulting mixture was microwaved for 50 min at 130 °C. The mixture was diluted with ethyl acetate and brine.

The aqueous phase was extracted twice with ethyl acetate, the combined organics were dried ( $\text{Na}_2\text{SO}_4$ ), filtered through diatomaceous earth and concentrated. Purification by flash silica gel chromatography using a gradient of chloroform/methanol 10:1-8:1-6:1 gave 5-(3-(3-amino-1-(2-(difluoromethyl)pyridin-4-yl)-4-fluoro-1H-isoindol-1-yl)phenyl)pyrimidine 1-oxide (131 mg) in 36 % yield. The enantiomers were separated by a SFC Berger Multigram II on a Chiralpak AD-H column (4.6\*250 mm; 5  $\mu\text{m}$ ) using 30 % methanol + 0.1 % diethyl amine/ 70 %  $\text{CO}_2$  as a mobile phase with a flow of 50 ml/min. The second eluting isomer was collected to give the title compound (44 mg) in 33 % yield, 99 % pure by UV and >99 % enantiomeric purity.

$^1\text{H}$  NMR (500 MHz,  $\text{DMSO-}d_6$ )  $\delta$  ppm 6.76 (br. s., 2 H), 6.92 (t,  $J=55.02$ , 1 H), 7.27 - 7.34 (m, 1 H), 7.45 - 7.53 (m, 3 H), 7.54 - 7.60 (m, 2 H), 7.66 (s, 1 H), 7.71 (dt,  $J=7.17$ , 1.62 Hz, 1 H), 7.85 (d,  $J=7.57$  Hz, 1 H), 8.53 (d,  $J=1.89$  Hz, 1 H), 8.59 (d,  $J=5.04$  Hz, 1 H), 8.89 (t,  $J=1.89$  Hz, 1 H), 9.05 (d,  $J=1.89$  Hz, 1 H); MS (ES+)  $m/z$  448  $[\text{M}+1]^+$ .

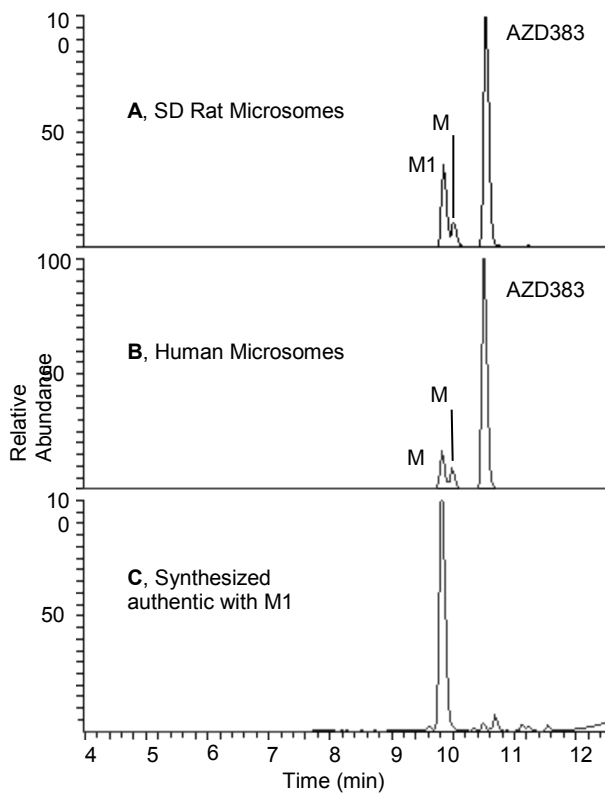

**Figure 2. Metabolic profiling of AZD3839 in microsomes. A) Rat microsomes B) Human microsomes. C) Synthesized M1.** LC-MS chromatograms are showing the MDF scan. Incubations were conducted at 1  $\mu$ M substrate concentration for 30 min. Proposed structures of identified metabolites are depicted in Figure 8 and Table 2. Relative abundance values are presented for each individual panel.

**Table 1. Summary of detected metabolites in excreta expressed as average fractions of the total administered dose of [<sup>3</sup>H]-(S)-25 to male Sprague Dawley rats (30 µmol/kg, 50 MBq/kg).**

| M#     | Fraction of dose (%) |                 |                    |      |
|--------|----------------------|-----------------|--------------------|------|
|        | Urine<br>0-24 h      | Feces<br>0-48 h | Bile 0-6 h<br>p.o. | i.v. |
| (S)-25 | 0.3                  |                 |                    | 0.2  |
| M1a    | 2                    |                 | 1.7                | 22   |
| M2a    | 0.4                  |                 |                    | 0.7  |
| M4a    |                      |                 | 0.4                | 0    |
| M5a    |                      |                 | 1.8                | 4.7  |
| M6a    |                      |                 | 0.8                | 2.0  |
| M7a    |                      |                 | 1.6                | 4.4  |
| M8a    |                      |                 | 7.3                | 20   |
| M9a    | 1.3                  |                 | 0.5                | 1.2  |
| Total  | 4                    | 94              | 14                 | 55   |

**Table 2. Summary of detected metabolites in excreta expressed as average fractions of the total administered dose of [<sup>14</sup>C]-AZD3839 to male Han Wistar rats (58 µmol/kg, 9.25 MBq/kg).**

| M#      | Fraction of dose (%) |                 |                     |
|---------|----------------------|-----------------|---------------------|
|         | Urine<br>0-24 h      | Feces<br>0-48 h | Bile 0-48 h<br>p.o. |
| AZD3839 | 0.35                 |                 |                     |
| M1      | 2.2                  |                 |                     |
| M2      | 3.4                  |                 | 4.0                 |
| M9      | 1.0                  |                 | 21                  |
| M11     |                      |                 | 4.8                 |
| M12     |                      |                 | 3.1                 |
| M17     |                      |                 | 2.6                 |
| M19     |                      |                 | 0.7                 |
| M23     |                      |                 | 3.1                 |
| M26     |                      |                 | 3.5                 |
| M31     |                      |                 | 1.5                 |
| M32     |                      |                 | 1.0                 |
| M34     |                      |                 | 1.7                 |
| M35     |                      |                 | 0.8                 |
| Total   | 6.9                  | 91              | 49                  |
